# Supplementary material for: Applying Microfluidics for the Production of the Cationic Liposome-Based Vaccine Adjuvant CAF09b
Source: MDPI journal article supplement (doi:10.3390/pharmaceutics12121237), 2020-12-19
Supplement: s1 [file s1]

# Supplementary Materials: Applying Microfluidics for the Production of the Cationic Liposome-Based Vaccine Adjuvant CAF09b

Signe Tandrup Schmidt, Dennis Christensen and Yvonne Perrie

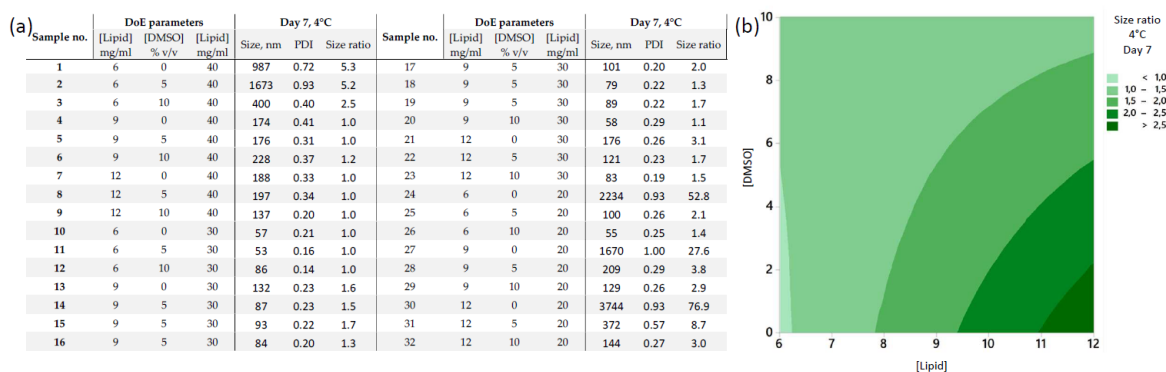

**Figure S1.** (a) Size, PDI and size ratio for all samples on day 7 at 4°C storage. (b) RSM model of the size ratio of samples on day 7, manufactured at 30% EtOH and stored at 4°C.

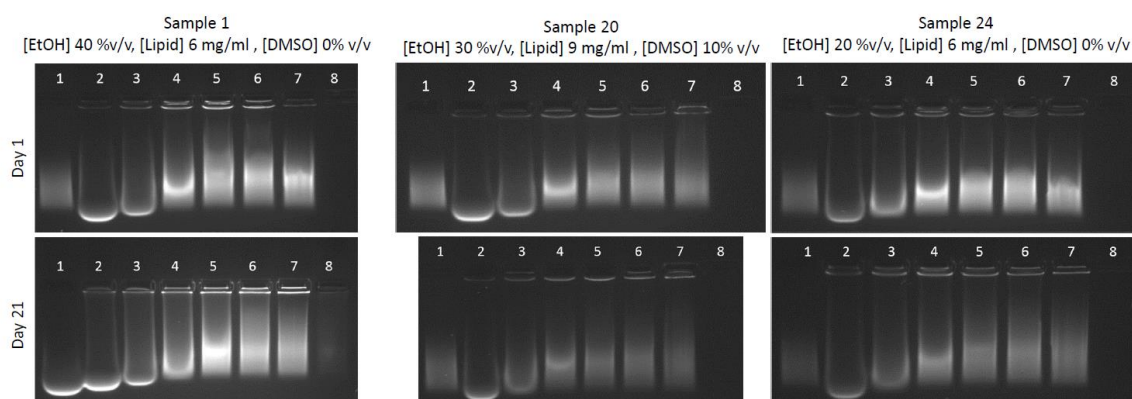

**Figure S2.** Release of poly(I:C) from CAF09b after SDS treatment. The samples were treated with 0, 0.1, 0.25, 0.5, 1, 2, and 3% SDS, and analyzed with agarose (1%) gel electrophoresis the day after preparation and 21 days after preparation, storage at 4°C. Lane 1: Poly(I:C) control, lane 2–8: CAF09b treated with 3, 2, 1, 0.5, 0.25, 0.1 and 0% SDS, respectively.

**Table S1.** Statistical significance of parameters in the RSM models.

| <b>Figure 1a</b>  |         |
|-------------------|---------|
| Source            | p-value |
| Model             | 0.000   |
| Linear            | 0.000   |
| [EtOH]            | 0.000   |
| [DMSO]            | 0.001   |
| Square            | 0.000   |
| [EtOH]*[EtOH]     | 0.000   |
| 2-way interaction | 0.007   |
| [EtOH]*[DMSO]     | 0.007   |
| Error             |         |
| Lack-of-fit       | 0.177   |
| <b>Figure 1b</b>  |         |
| Source            | p-value |
| Model             | 0.001   |
| Linear            | 0.074   |
| [EtOH]            | 0.123   |
| [Lipid]           | 0.353   |
| [DMSO]            | 0.041   |
| Square            | 0.001   |
| [EtOH]*[EtOH]     | 0.001   |
| 2-way interaction | 0.004   |
| [EtOH]*[DMSO]     | 0.003   |
| [Lipid]*[DMSO]    | 0.084   |
| Error             |         |
| Lack-of-fit       | 0.044   |
| <b>Figure 1c</b>  |         |
| Source            | p-value |
| Model             | 0.004   |
| Linear            | 0.004   |
| [EtOH]            | 0.004   |
| [DMSO]            | 0.046   |
| Square            | 0.082   |
| [EtOH]*[EtOH]     | 0.082   |
| Error             |         |
| Lack-of-fit       | 0.962   |
| <b>Figure 2a</b>  |         |
| Source            | p-value |
| Model             | 0.017   |
| Linear            | 0.007   |
| [Lipid]           | 0.006   |
| [DMSO]            | 0.041   |
| Square            | 0.729   |
| [Lipid]*[Lipid]   | 0.574   |
| [DMSO]*[DMSO]     | 0.797   |
| 2-way interaction | 0.024   |
| [Lipid]*[DMSO]    | 0.024   |
| Error             |         |
| Lack-of-fit       | 0.320   |

| <b>Figure 2b</b>               |         |
|--------------------------------|---------|
| Source                         | p-value |
| Model                          | 0.006   |
| Linear                         | 0.002   |
| [Lipid]                        | 0.002   |
| [DMSO]                         | 0.018   |
| Square                         | 0.925   |
| [Lipid]*[Lipid]                | 0.760   |
| [DMSO]*[DMSO]                  | 0.934   |
| 2-way interaction              | 0.019   |
| [Lipid]*[DMSO]                 | 0.019   |
| Error                          |         |
| Lack-of-fit                    | 0.145   |
| <b>Figure 2c</b>               |         |
| Source                         | p-value |
| Model                          | 0.243   |
| Linear                         | 0.200   |
| [Lipid]                        | 0.867   |
| [DMSO]                         | 0.083   |
| Square                         | 0.179   |
| [Lipid]*[Lipid]                | 0.373   |
| [DMSO]*[DMSO]                  | 0.072   |
| 2-way interaction              | 0.690   |
| [Lipid]*[DMSO]                 | 0.690   |
| Error                          |         |
| Lack-of-fit                    | 0.179   |
| <b>Figure 2d</b>               |         |
| Source                         | p-value |
| Model                          | 0.262   |
| Linear                         | 0.269   |
| [Lipid]                        | 0.244   |
| [DMSO]                         | 0.251   |
| Square                         | 0.159   |
| [Lipid]*[Lipid]                | 0.253   |
| [DMSO]*[DMSO]                  | 0.066   |
| 2-way interaction              | 0.622   |
| [Lipid]*[DMSO]                 | 0.622   |
| Error                          |         |
| Lack-of-fit                    | 0.081   |
| <b>Figure 3a</b>               |         |
| Source                         | p-value |
| Model                          | 0.003   |
| Linear                         | 0.003   |
| [EtOH]                         | 0.013   |
| [Lipid]                        | 0.007   |
| Error                          |         |
| Lack-of-fit                    | 0.082   |
| <b>Supplementary figure 1b</b> |         |
| Source                         | p-value |
| Model                          | 0.010   |

|                   |       |
|-------------------|-------|
| Linear            | 0.003 |
| [Lipid]           | 0.003 |
| [DMSO]            | 0.027 |
| Square            | 0.989 |
| [Lipid]*[Lipid]   | 0.946 |
| [DMSO]*[DMSO]     | 0.929 |
| 2-way interaction | 0.025 |
| [Lipid]*[DMSO]    | 0.025 |
| Error             |       |
| Lack-of-fit       | 0.376 |
